# Supplementary material
Source: PubMed Central journal article supplement (PMC7497665)
Supplement: mp0c00155_si_001.pdf [file mp0c00155_si_001.pdf]

# Binding site interactions of modulators of Breast Cancer Resistance Protein, Multidrug Resistance Associated Protein 2 and P-glycoprotein activity

Feng Deng, Leo Ghemtio, Evgeni Grazhdankin, Peter Wipf, Henri Xhaard, Heidi Kidron

## SUPPORTING INFORMATION

|                                                                               |         |
|-------------------------------------------------------------------------------|---------|
| Supporting information 1 – homology modelling protocol                        | page 2  |
| Supporting information 2 – in vitro activity and docking score values         | page 4  |
| Supporting information 3 – comparison of MRP2 assay results                   | page 5  |
| Supporting information 4 – nephelometer results                               | page 6  |
| Supporting information 5 – RMSD value matrix                                  | page 7  |
| Supporting information 6 – visualization of docked substrates                 | page 8  |
| Supporting information 7 – correlation of activity and docking score          | page 9  |
| Supporting information 8 – correlation of activity and number of interactions | page 10 |
| Supporting information 9 – MRP2 interaction to 2aw, 2ax, 2az, 2bb and 2o      | page 11 |

## SUPPORTING INFORMATION 1

### *Homology modelling protocol*

MODELLER (v9.18) (Šali and Blundell, 1993) was used as the homology modelling program.

#### **Alignment**

##### **MRP2**

Sequences and their alignment were fetched from Ensembl database (release 89) (Zerbino *et al.*, 2018). To include all the MRP genes of interest (MRP1 cow and human; MRP2 human, MRP3 human) we took the deepest node from the genetic tree containing all these.

Selection returned around 200 sequences. The tree was opened in Jalview (Waterhouse *et al.*, 2009) and a few outliers were removed manually, totalling in 196 sequences.

Correspondence of the used Uniprot entries (Bateman *et al.*, 2017) to Ensembl is shown in Table S1 for convenience.

*Table S1: Mapping of Uniprot entries to Ensembl database.*

| <b><i>Uniprot entry</i></b> | <b><i>Ensembl entry</i></b> |
|-----------------------------|-----------------------------|
| MRP1_HUMAN                  | ENSP00000382342_Hsap        |
| MRP2_HUMAN                  | ENSP00000359478_Hsap        |
| MRP3_HUMAN                  | ENSP00000285238_Hsap        |
| MRP1_BOVIN                  | ENSBTAP00000028094_Btau     |

#### **P-gp**

Sequences of pdb ids 3g5u, 4q9k, 5ko2 were aligned to MDR1\_HUMAN (from Uniprot) with Clustal Omega (v.1.2.4) (Sievers *et al.*, 2011).

#### **Modelling**

##### **MRP2**

Template: 5uja (pdb id).

Model sequence: ENSP00000359478\_Hsap, corresponding to MRP2\_HUMAN.

Alignment: ENSEMBL\_ABCC1\_cow\_\_ABCC2\_human.ali with one residue exchanged (V to M at position 986 by MODELLER counting, in ENSBTAP00000028094\_Btau corresponding to 5uja). Sequence identity: 55.4% (5uja)."

Modelling: Slow refinement, 200 models.

Assessment: The best model was selected by the global DOPE score.

MODELLER restraint violations were mostly few, except for the Phi/Psi pair group, which had around 20 violations. However, since there was approximately the same number of violations in this group when modelling self (5uja to 5uja), this should be acceptable.

#### **P-gp**

Templates: A-chains of 3g5u, 4q9k, 5ko2 (pdb ids).

Model sequence: MDR1\_HUMAN (from Uniprot).

Alignment: MDR1\_HUMAN\_\_5ko2\_3g5u\_4q9k.ali. Sequence identities at 89.1% (3g5u), 88.8% (4q9k), 88.9% (5ko2).

Modelling: Standard protocol, 100 models.

Assessment: The best model was selected by the global DOPE score.

Restraint violations were comparable to self on individual templates (tested with 5ko2).

## References

Bateman, A. *et al.* (2017) 'UniProt: the universal protein knowledgebase', *Nucleic Acids Research*. Oxford University Press, 45(D1), pp. D158–D169. doi: 10.1093/nar/gkw1099.

Šali, A. and Blundell, T. L. (1993) 'Comparative Protein Modelling by Satisfaction of Spatial Restraints', *Journal of Molecular Biology*, 234(3), pp. 779–815. doi: <https://doi.org/10.1006/jmbi.1993.1626>.

Sievers, F. *et al.* (2011) 'Fast, scalable generation of high-quality protein multiple sequence alignments using Clustal Omega.', *Molecular systems biology*. EMBO Press, 7(1), p. 539. doi: 10.1038/msb.2011.75.

Waterhouse, A. M. *et al.* (2009) 'Jalview Version 2—a multiple sequence alignment editor and analysis workbench', *Bioinformatics*, 25(9), pp. 1189–1191. doi: 10.1093/bioinformatics/btp033.

Zerbino, D. R. *et al.* (2018) 'Ensembl 2018', *Nucleic Acids Research*. Oxford University Press, 46(D1), pp. D754–D761. doi: 10.1093/nar/gkx1098.

## SUPPORTING INFORMATION 2

The relative inhibitory activity and the docking score of tested compounds against each transporter: 100% inhibition denotes full inhibition, 0% no inhibition and negative value indicates stimulation of probe transport. The binding affinity between the compound and the transporter are described with a docking score, where a low score indicates high affinity of the compound to the protein. SBC stands for substrate-binding cavity and NBD for nucleotide-binding domain.

|             | BCRP                 |              |              | MRP2                 |              |              | P-gp                 |              |              |
|-------------|----------------------|--------------|--------------|----------------------|--------------|--------------|----------------------|--------------|--------------|
|             | Inhibition %<br>(sd) | SBC<br>score | NBD<br>score | Inhibition %<br>(sd) | SBC<br>score | NBD<br>score | Inhibition %<br>(sd) | SBC<br>score | NBD<br>score |
| Scaffold 1  |                      |              |              |                      |              |              |                      |              |              |
| 1a          | 69.2 (2.8)           | -7.3         | -4.3         | 84 (2)               | -7.0         | -3.1         | 43.9 (6.9)           | -6.3         | -2.9         |
| 1aa         | 98.3 (0.2)           | -7.0         | -2.1         | 97.7 (2.6)           | -5.2         | -2.8         | 13.8 (13.2)          | -6.6         | -3.6         |
| 1ac         | 97.7 (0.3)           | -7.7         | -3.6         | 90 (1.9)             | -5.5         | -3.2         | -33.1 (19.6)         | -3.8         | -3.2         |
| 1ad         | 92.9 (2.4)           | -8.4         | -0.9         | 50.6 (7.1)           | -3.5         | -4.9         | 67.6 (3.4)           | -8.4         | -2.7         |
| 1ag         | 88.3 (0.7)           | -9.3         | -1.2         | 53 (9.3)             | -4.8         | -5.2         | 10.1 (8.4)           | -9.7         | -2.9         |
| 1b          | 99 (0.2)             | -7.5         | -2.0         | 81.5 (3.5)           | -5.2         | -5.6         | 93.3 (2.7)           | -7.8         | -2.8         |
| 1d          | 95 (0.4)             | -8.3         | -1.7         | 66.9 (7.8)           | -5.5         | -6.2         | 80.8 (3)             | -9.4         | -3.0         |
| 1e          | 84.3 (1.4)           | -7.7         | -3.4         | 89 (3.6)             | -7.5         | -3.0         | 37.6 (9.4)           | -6.6         | -2.8         |
| 1f          | 99.1 (0.4)           | -7.9         | -1.9         | 76.5 (4)             | -4.7         | -3.5         | 91.2 (2.6)           | -8.1         | -2.4         |
| 1g          | 99.5 (0.5)           | -8.3         | -1.7         | 83.5 (4.6)           | -3.9         | -3.1         | 89.6 (2.1)           | -7.7         | -2.9         |
| 1i          | 99.6 (0.4)           | -6.9         | -0.3         | 79 (6.8)             | -4.5         | -3.0         | 90 (3.2)             | -6.6         | -3.4         |
| 1j          | 98.3 (0.5)           | -9.0         | -2.2         | 82.5 (2.5)           | -5.8         | -5.6         | 36.6 (8)             | -8.4         | -2.8         |
| 1k          | 98.4 (0.2)           | -7.0         | -1.5         | 70 (4.7)             | -4.8         | -3.9         | 48.1 (9.2)           | -7.0         | -3.5         |
| 1l          | 98.5 (0.3)           | -7.4         | -3.3         | 93.9 (1.3)           | -4.9         | -5.1         | 8.4 (13.9)           | -7.2         | -3.0         |
| 1q          | 98.5 (0.1)           | -8.9         | -2.1         | 93.1 (2)             | -3.6         | -3.1         | 27.8 (4.5)           | -7.2         | -2.6         |
| Scaffold 2A |                      |              |              |                      |              |              |                      |              |              |
| 2ab         | 97.6 (0.6)           | -8.9         | -0.9         | 5.4 (23.9)           | -6.6         | -5.8         | 86.9 (2.5)           | -9.3         | -3.0         |
| 2g          | 98 (0.2)             | -8.3         | -1.0         | 36.4 (13.2)          | -6.0         | -6.1         | 98.5 (1.6)           | -8.5         | -3.0         |
| 2h          | 98.2 (0.1)           | -8.7         | -2.8         | 27.8 (17)            | -5.1         | -4.7         | 58.4 (2.7)           | -8.3         | -2.5         |
| Scaffold 2B |                      |              |              |                      |              |              |                      |              |              |
| 2ac         | 91.7 (0.6)           | -7.6         | -2.3         | 77.7 (4.4)           | -7.6         | -5.1         | 18.9 (6.5)           | -8.1         | -3.5         |
| 2ad         | 90 (0.4)             | -6.6         | -4.6         | 80.4 (3.7)           | -10.9        | -6.2         | 14.7 (5.7)           | -8.5         | -4.0         |
| 2ae         | 92.8 (0.6)           | -7.6         | -5.0         | 88.6 (2.2)           | -8.5         | -4.8         | 42.3 (5.9)           | -7.2         | -4.4         |
| 2af         | 15.2 (3.2)           | -6.1         | -4.4         | 27.4 (14.6)          | -8.2         | -5.3         | -11.7 (7.4)          | -6.2         | -4.3         |
| 2ag         | 69.1 (0.8)           | -9.0         | -1.8         | -3.1 (19.8)          | -8.4         | -5.2         | -62.5 (12.9)         | -7.7         | -3.6         |
| 2ah         | 95.5 (1)             | -8.3         | -3.6         | 83.3 (5.5)           | -9.9         | -6.9         | -45.5 (9.3)          | -8.6         | -4.1         |
| 2al         | 96.9 (0.3)           | -8.2         | -3.7         | 92.9 (1.8)           | -10.0        | -5.9         | 34.1 (4.8)           | -8.1         | -4.2         |
| 2i          | 58.2 (4.6)           | -6.9         | -4.4         | 27.8 (25.4)          | -7.0         | -6.9         | -2.2 (13.7)          | -7.9         | -3.8         |
| Scaffold 2C |                      |              |              |                      |              |              |                      |              |              |
| 2an         | 82.6 (1.3)           | -7.3         | -3.3         | 25.4 (14.1)          | -9.3         | -6.2         | 21.1 (13.6)          | -7.1         | -4.1         |
| 2ao         | 60.8 (1.7)           | -6.9         | -4.9         | 22.2 (22.1)          | -8.9         | -5.3         | -34.5 (14.4)         | -7.6         | -3.4         |
| 2au         | 95.5 (0.2)           | -9.9         | -5.0         | 81.7 (4.2)           | -11.1        | -6.5         | 62.3 (2.2)           | -9.6         | -3.3         |
| 2av         | 96.8 (0.3)           | -8.9         | -3.7         | 85.2 (3.9)           | -9.8         | -6.1         | 70.3 (3.3)           | -9.4         | -3.1         |
| 2aw         | 97.8 (0.1)           | -8.9         | -4.2         | 97.8 (0.7)           | -9.6         | -4.2         | 95.9 (1.5)           | -9.1         | -3.9         |
| 2ax         | 98.8 (1)             | -9.0         | -4.2         | 86.9 (2)             | -10.2        | -6.7         | 75.7 (4)             | -8.6         | -4.1         |
| 2az         | 94.7 (0.5)           | -9.2         | -3.6         | 77.7 (4.7)           | -10.5        | -7.4         | 66.7 (5.5)           | -9.1         | -4.0         |
| 2bb         | 99.5 (0.3)           | -9.9         | -4.7         | 96.2 (1.7)           | -10.4        | -5.7         | 84.8 (1.4)           | -9.4         | -3.3         |
| 2o          | 94.1 (0.5)           | -7.8         | -4.1         | 69.2 (5.9)           | -6.8         | -7.5         | 27.8 (12.5)          | -8.3         | -4.0         |
| 2p          | 84.4 (1.7)           | -8.5         | -3.1         | 26 (25.9)            | -9.0         | -4.7         | 10.2 (10.4)          | -7.8         | -4.9         |
| Scaffold 3  |                      |              |              |                      |              |              |                      |              |              |
| 3aa         | 96.9 (0.3)           | -8.3         | -1.0         | 53.7 (13.1)          | -5.0         | -5.6         | -87.9 (25.1)         | -7.7         | -3.0         |
| 3ab         | 98.3 (0.9)           | -8.4         | -2.9         | 45.6 (12.5)          | -6.4         | -7.7         | -4.1 (10.8)          | -8.8         | -4.0         |
| 3ac         | 100.2 (-0.3)         | -9.9         | -1.9         | 92.6 (2.4)           | -6.8         | -4.7         | 68.2 (2.7)           | -9.7         | -4.4         |
| 3ad         | 99.3 (0.5)           | -9.9         | -1.2         | 87.6 (8.6)           | -6.6         | -4.8         | 77.1 (4)             | -10.6        | -4.8         |
| 3ag         | 85 (0.3)             | -10.3        | -1.5         | 37.1 (13.8)          | -5.2         | -6.5         | 40.5 (2.8)           | -10.0        | -3.3         |
| 3b          | 95.4 (0.8)           | -7.3         | -5.0         | 74.9 (4.6)           | -4.5         | -6.0         | 50.4 (3.5)           | -7.3         | -2.4         |
| 3c          | 85.9 (1.5)           | -7.7         | -1.5         | 11 (20)              | -5.6         | -4.6         | -98 (21.1)           | -8.5         | -2.8         |
| 3j          | 99.5 (0.1)           | -8.5         | -1.9         | 81.4 (5)             | -5.1         | -6.5         | -1.1 (25.4)          | -9.2         | -3.2         |

### SUPPORTING INFORMATION 3

The relationship between two independent MRP2 experiments. The previous inhibitory activity (Y-axis, %) (Wissel et al., 2017; Wissel et al., 2015) and the current MRP2 inhibition data (X-axis, %) at 80µM test compound concentration.

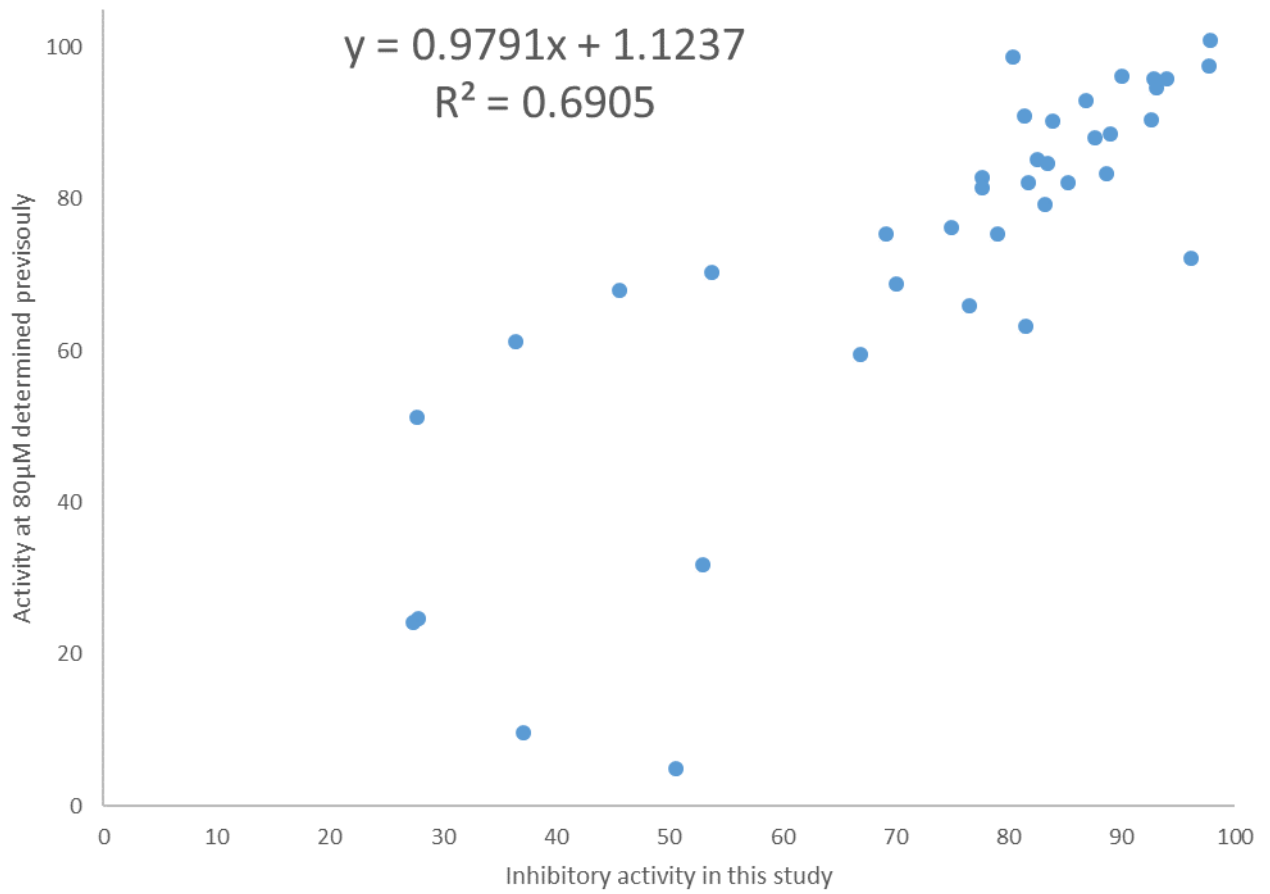

## SUPPORTING INFORMATION 4

Interference by the aggregation of studied compounds in the assay was evaluated with a Nepheloskan Ascent nephelometer (Thermo Fisher Scientific, USA) with a lamp voltage of 10 and photomultiplier tube voltage of 250. In the aggregation control test, the turbidity by light scattering of vesicular transport assay solution is expressed in RNUs (relative nephelometry units). The samples contained 80  $\mu\text{M}$  of test compound, and were measured in triplicates. Only DMSO was added to the assay solution in the control.

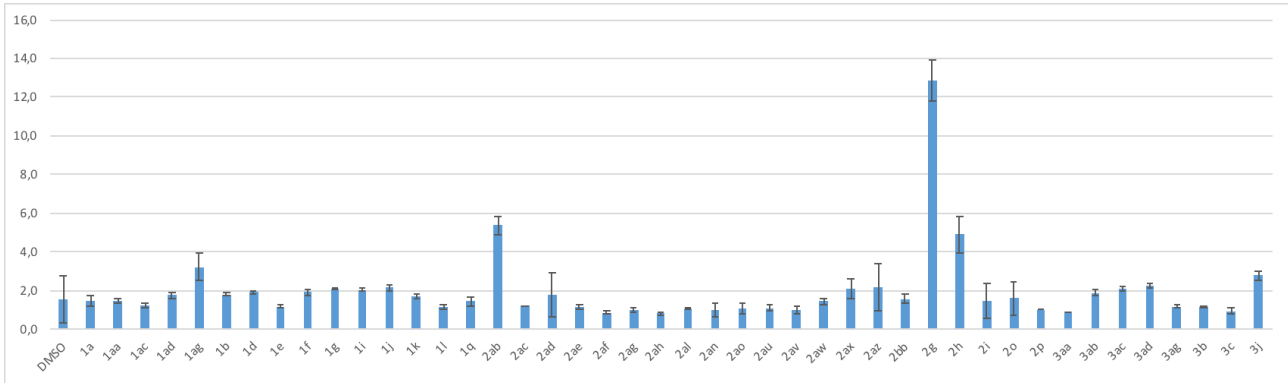

## SUPPORTING INFORMATION 5

RMSD value matrix for nucleotide-binding domains of BCRP (PDB ID 5NJ3), P-gp and MRP2 models. NDBs were structurally aligned with TM-align (Zhang and Skolnick 2005). The figure was generated using Matplotlib (v3.1, Hunter 2007) and Seaborn (v0.9, Waskom).

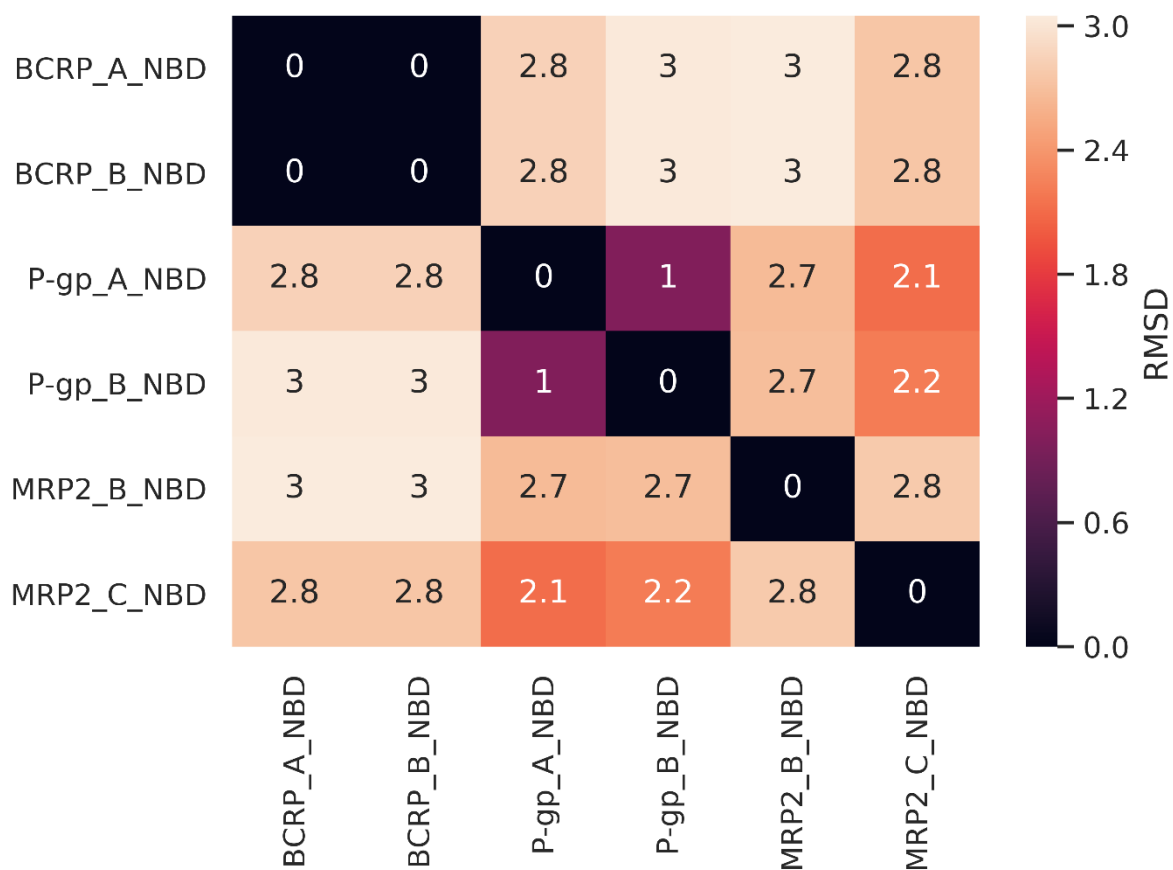

### References

Hunter, J.D, 2007. Matplotlib: A 2D Graphics Environment. Computing in Science & Engineering, 9, 90–95.  
Waskom, M. seaborn. Available at <http://seaborn.pydata.org> (accessed 04.02.2020)

## SUPPORTING INFORMATION 6

Visualization of substrates used in the in vitro assays docked to the SBC of the three transporters. A) BCRP and Lucifer Yellow, B) MRP2 and CDCF and C) P-gp and NMQ.

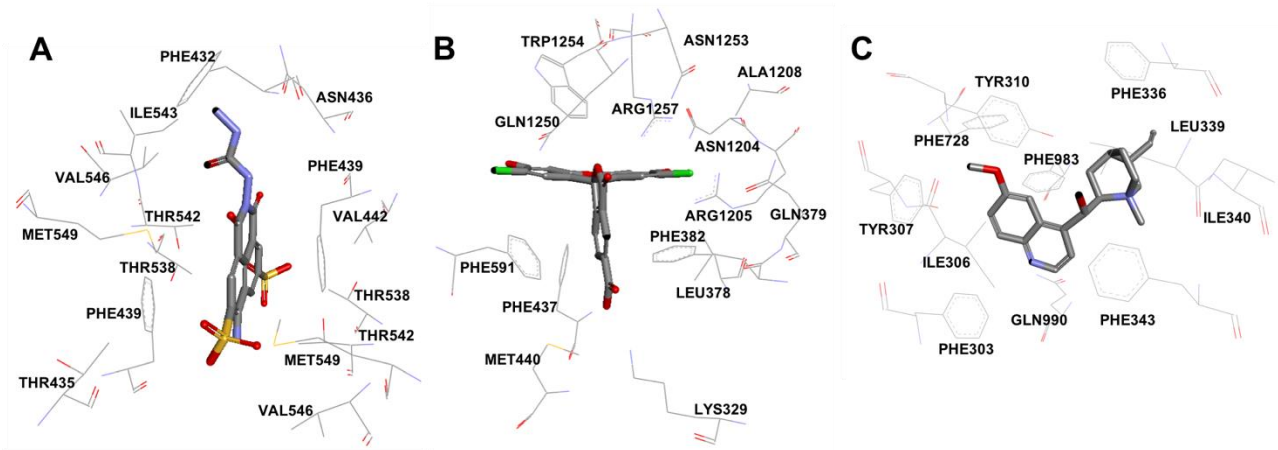



## SUPPORTING INFORMATION 7

The relationship between inhibitory activity and SBC docking score illustrated in XY-plots. In the plots, compounds in different scaffolds are marked with distinctive color and shape: scaffold 1 (green square), scaffold 2A (purple ascending triangle), scaffold 2B (orange descending triangle), scaffold 2C (red diamond) and scaffold 3 (blue circle). Below the plots, the GraphPad Prism determined coefficient of determination ( $R^2$ ) and p-value whether the slope of fit is significantly non-zero are presented. Linear fit for scaffold 2A was not attempted due to small number of data points. Stimulators are not visualized in the plots, but they were taken into consideration in the linear regression.

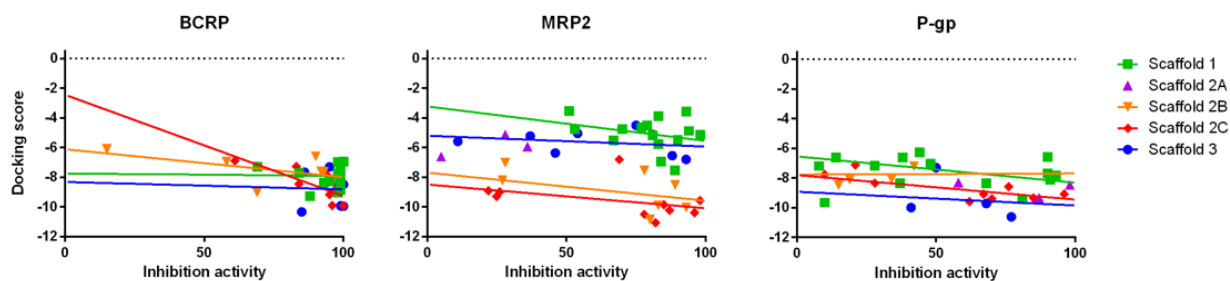

|             | $R^2$ | p       | $R^2$ | p     | $R^2$ | p       |
|-------------|-------|---------|-------|-------|-------|---------|
| Scaffold 1  | 0.000 | 0.949   | 0.086 | 0.289 | 0.228 | 0.072   |
| Scaffold 2B | 0.305 | 0.156   | 0.271 | 0.186 | 0.002 | 0.927   |
| Scaffold 2C | 0.641 | 0.005 * | 0.169 | 0.238 | 0.625 | 0.007 * |
| Scaffold 3  | 0.001 | 0.950   | 0.063 | 0.548 | 0.306 | 0.155   |

## SUPPORTING INFORMATION 8

Correlation of in vitro activity and number of interactions of certain nature within compound scaffolds. The type of interaction is denoted on the top of column. Slope describes the slope of linear regression between activity and number of interactions, R<sup>2</sup> goodness of the fit and p-value whether the slope deviates significantly from zero. The values highlighted with red color indicates statistically significant correlation.

### BCRP

| Scaffold    | Acceptor | Aromatic | Backbone | Contact | Donor  | Hydrophobic | Polar  | Sidechain |
|-------------|----------|----------|----------|---------|--------|-------------|--------|-----------|
| Scaffold 1  |          |          |          |         |        |             |        |           |
| slope       | -0.007   | -0.030   | 0.005    | 0.026   |        | -0.016      | 0.038  | 0.022     |
| R2          | 0.022    | 0.100    | 0.002    | 0.035   |        | 0.010       | 0.376  | 0.022     |
| p-value     | 0.599    | 0.252    | 0.875    | 0.501   |        | 0.725       | 0.015  | 0.596     |
| Scaffold 2B |          |          |          |         |        |             |        |           |
| slope       |          | -0.010   | 0.008    | -0.002  |        | -0.010      | 0.008  | -0.002    |
| R2          |          | 0.272    | 0.031    | 0.008   |        | 0.146       | 0.192  | 0.006     |
| p-value     |          | 0.185    | 0.679    | 0.837   |        | 0.351       | 0.278  | 0.855     |
| Scaffold 2C |          |          |          |         |        |             |        |           |
| slope       |          | -0.020   | 0.007    | -0.051  | -0.049 | -0.072      | -0.002 | -0.074    |
| R2          |          | 0.129    | 0.007    | 0.169   | 0.694  | 0.302       | 0.001  | 0.253     |
| p-value     |          | 0.309    | 0.817    | 0.238   | 0.003  | 0.100       | 0.947  | 0.138     |
| Scaffold 3  |          |          |          |         |        |             |        |           |
| slope       | 0.012    | 0.008    | 0.104    | -0.038  |        | -0.062      | 0.023  | -0.038    |
| R2          | 0.023    | 0.008    | 0.258    | 0.008   |        | 0.056       | 0.014  | 0.008     |
| p-value     | 0.720    | 0.836    | 0.199    | 0.831   |        | 0.572       | 0.780  | 0.831     |

### MRP2

| Scaffold    | Acceptor | Aromatic | Backbone | Charged | Contact | Donor  | Hydrophobic | Polar  | Sidechain |
|-------------|----------|----------|----------|---------|---------|--------|-------------|--------|-----------|
| Scaffold 1  |          |          |          |         |         |        |             |        |           |
| slope       | 0.004    | -0.017   | -0.027   | 0.002   | -0.095  | 0.011  | -0.039      | -0.053 | -0.092    |
| R2          | 0.043    | 0.057    | 0.045    | 0.001   | 0.325   | 0.044  | 0.133       | 0.134  | 0.422     |
| p-value     | 0.457    | 0.393    | 0.450    | 0.930   | 0.026   | 0.455  | 0.181       | 0.180  | 0.009     |
| Scaffold 2B |          |          |          |         |         |        |             |        |           |
| slope       | -0.010   | 0.004    | -0.006   | 0.001   | 0.027   | 0.006  | 0.018       | 0.009  | 0.028     |
| R2          | 0.641    | 0.020    | 0.031    | 0.001   | 0.104   | 0.113  | 0.172       | 0.100  | 0.203     |
| p-value     | 0.017    | 0.739    | 0.676    | 0.932   | 0.436   | 0.416  | 0.307       | 0.445  | 0.263     |
| Scaffold 2C |          |          |          |         |         |        |             |        |           |
| slope       | 0.004    | 0.003    | 0.019    | 0.006   | 0.055   | -0.003 | 0.023       | 0.032  | 0.055     |
| R2          | 0.130    | 0.015    | 0.339    | 0.121   | 0.538   | 0.015  | 0.269       | 0.653  | 0.538     |
| p-value     | 0.307    | 0.735    | 0.078    | 0.325   | 0.016   | 0.739  | 0.125       | 0.005  | 0.016     |
| Scaffold 3  |          |          |          |         |         |        |             |        |           |
| slope       | -0.006   | 0.003    | 0.035    | 0.008   | 0.034   | 0.013  | -0.021      | 0.033  | 0.012     |
| R2          | 0.048    | 0.004    | 0.502    | 0.092   | 0.226   | 0.338  | 0.120       | 0.235  | 0.044     |
| p-value     | 0.604    | 0.881    | 0.049    | 0.466   | 0.234   | 0.131  | 0.401       | 0.224  | 0.616     |

### P-gp

| Scaffold    | Acceptor | Aromatic | Backbone | Contact | Donor  | Hydrophobic | Polar  | Sidechain |
|-------------|----------|----------|----------|---------|--------|-------------|--------|-----------|
| Scaffold 1  |          |          |          |         |        |             |        |           |
| slope       | 0.003    | -0.014   | -0.010   | -0.013  | -0.004 | -0.009      | -0.002 | -0.011    |
| R2          | 0.045    | 0.084    | 0.049    | 0.052   | 0.339  | 0.040       | 0.017  | 0.047     |
| p-value     | 0.450    | 0.293    | 0.426    | 0.412   | 0.023  | 0.477       | 0.646  | 0.440     |
| Scaffold 2B |          |          |          |         |        |             |        |           |
| slope       |          | 0.029    | 0.000    | 0.029   | -0.004 | 0.020       | 0.003  | 0.022     |
| R2          |          | 0.413    | 0.000    | 0.198   | 0.082  | 0.168       | 0.025  | 0.140     |
| p-value     |          | 0.086    | 0.987    | 0.269   | 0.491  | 0.314       | 0.706  | 0.361     |
| Scaffold 2C |          |          |          |         |        |             |        |           |
| slope       | 0.001    | -0.011   | 0.004    | 0.002   | 0.015  | -0.009      | 0.011  | 0.002     |
| R2          | 0.036    | 0.069    | 0.034    | 0.003   | 0.626  | 0.046       | 0.302  | 0.003     |
| p-value     | 0.600    | 0.462    | 0.611    | 0.887   | 0.006  | 0.551       | 0.100  | 0.887     |
| Scaffold 3  |          |          |          |         |        |             |        |           |
| slope       | -0.001   | 0.020    | 0.004    | 0.025   |        | 0.021       | 0.004  | 0.025     |
| R2          | 0.014    | 0.356    | 0.048    | 0.729   |        | 0.773       | 0.375  | 0.729     |
| p-value     | 0.781    | 0.119    | 0.604    | 0.007   |        | 0.004       | 0.107  | 0.007     |

# SUPPORTING INFORMATION 9

Adjacent residues of MRP2 interacting scaffold 2C compounds 2aw, 2ax, 2az, 2bb and 2o

Inhibitor-2aw

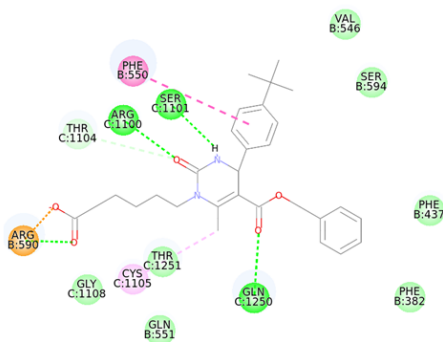

- Interactions**
- van der Waals
  - Salt Bridge
  - Conventional Hydrogen Bond
  - Carbon Hydrogen Bond
  - Pi-Pi T-shaped
  - Alkyl

Inhibitor-2ax

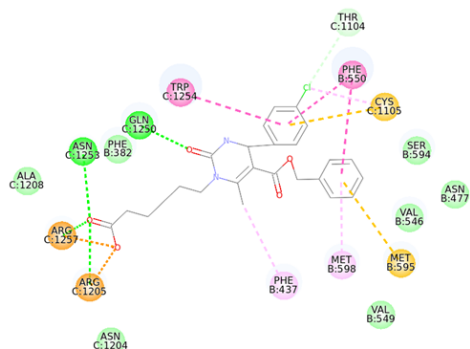

- Interactions**
- van der Waals
  - Salt Bridge
  - Conventional Hydrogen Bond
  - Carbon Hydrogen Bond
  - Pi-Sulfur
  - Pi-Pi Stacked
  - Pi-Pi T-shaped
  - Alkyl
  - Pi-Alkyl

Inhibitor-2az

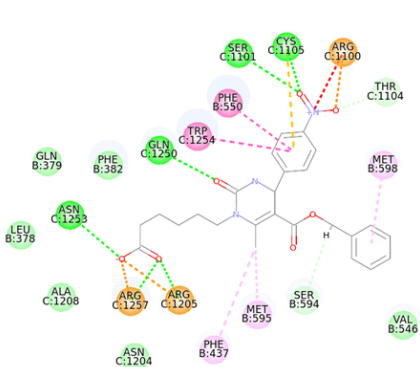

- Interactions**
- van der Waals
  - Salt Bridge
  - Conventional Hydrogen Bond
  - Carbon Hydrogen Bond
  - Unfavorable Positive-Positive
  - Pi-Sulfur
  - Pi-Pi Stacked
  - Pi-Pi T-shaped
  - Alkyl
  - Pi-Alkyl

Inhibitor-2bb

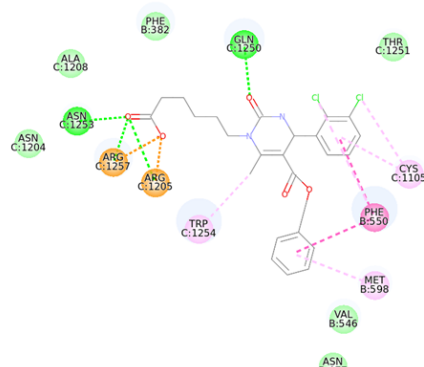

- Interactions**
- van der Waals
  - Salt Bridge
  - Conventional Hydrogen Bond
  - Pi-Pi Stacked
  - Pi-Pi T-shaped
  - Alkyl
  - Pi-Alkyl

Inhibitor-2o

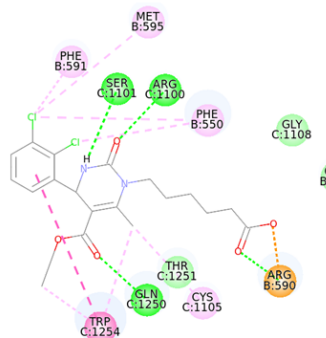

- Interactions**
- van der Waals
  - Salt Bridge
  - Conventional Hydrogen Bond
  - Pi-Pi T-shaped
  - Alkyl
  - Pi-Alkyl
